# Supplementary material
Source: Research Square preprint supplement (doi:10.21203/rs.3.rs-9311863/v1)
Supplement: Supplementary file 1 [file 30fdeb80380206812e78609e.docx]

**Supplementary Materials**

**Supplementary Methods**

**Supplementary Figures**

Figure S1. Measurements in 7 participants with BCRL at baseline (week 0) and post-intervention (week 10) in the Pilates group.

Figure S2. Measurements in 7 participants with BCRL at baseline (week 0) and post-intervention (week 10) in the complex exercise group.

**Supplementary Methods**

Baseline and follow-up evaluations were performed remotely using the Zoom platform with live supervision by members of the research team. Quality of life (QoL) was measured using a self-administered questionnaire distributed to participants by email prior to the virtual assessment session. Lymphoedema severity was subsequently evaluated, followed by mobility assessments. Detailed descriptions of all assessment procedures are provided in the following.

**QoL assessment**

The RAND 36-Item Health Survey, also known as the 36-Item Short Form Health Survey (SF-36) is a validated and reliable questionnaire designed to measure self-perceived physical and mental health status [1]. The SF-36 evaluates eight health domains. According to the SF-36 official scoring manual, questionnaire items were scored and summed according to the instructions and then transformed to a 0–100 scale for each domain. For interpretation, raw scores in eight SF-36 domains were converted to norm-based scores (NBS). The Health Change item, however, was analysed as a raw score because it is not included in the norm-based scoring system. Normalization was performed using U.S. population values [2], with the mean set at 50 and the standard deviation (SD) at 10 [3], as shown in the formula below:


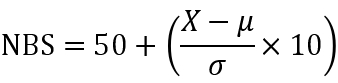


where 𝑋 is the participant’s raw domain score, 𝜇 is the U.S. population mean for the specific domain, and 𝜎 is the U.S. population SD for that domain. Higher scores indicate better health status, and an improvement of three or more norm-based points is generally considered clinically meaningful [4].

**Lymphoedema severity measurements**

In this study, lymphoedema severity was assessed using circumferential measurements of the limbs with a flexible, non-stretchable tape. Participants were instructed to remove any compression garments before measurements. Assessments were performed on both the affected and unaffected limbs, with predefined landmarks marked on the skin to ensure consistency across repeated sessions. The tape was applied snugly against the skin without compressing the underlying tissue, as excessive pressure could result in underestimation of limb circumference. Two measurements were recorded at each site, and the average was used for analysis. If the two readings differed by more than 1 cm, a third measurement was taken to reduce technical error.

Measurements were conducted with the participant seated, the arm abducted and pronated so that the palm faced downward. The entire arm was supported on a stable, flat surface, with the proximal end of the support aligned with the anterior axillary fold. Circumferential measurements were obtained at three locations: (1) the wrist, at the level of the radial and ulnar styloid processes; (2) 10 cm distal to the olecranon process (below the elbow); and (3) 15 cm proximal to the olecranon process (above the elbow).

**Anthropometric measurements**

All anthropometric measurements were performed twice, and the mean value was used for analysis. If the two trials differed by more than 10%, a technical error was assumed, and the measurement was repeated unless otherwise specified.

**Height and weight:** Height (without shoes) and weight were self-reported by participants

**BMI:** BMI was calculated using the standard formula [5]:

**Waist and hip circumference:** Participants were asked to lift their shirt to expose the waist, stand upright with feet together, and exhale naturally without engaging the abdominal muscles. Waist circumference was measured horizontally at the midpoint between the lowest rib and the top of the hip bone, typically just above the navel. Hip circumference was measured at the widest part of the hips. The tape was positioned snugly but not tight, and all measurements were recorded to the nearest 0.1 cm. The waist-to-hip ratio was subsequently calculated as [6]:

**Mobility assessments**

All mobility measurements were performed twice, with the mean value used for analysis. If the two trials differed by more than 10%, the measurement was repeated to minimize technical error. Participants were advised to wear compression garments when feasible.

**Chair Sit-and-Reach (CSR) Test**: The CSR test assesses lower-body flexibility, primarily targeting the hamstrings [7]. Participants sat on the edge of a chair positioned against a wall for stability, with the seat approximately at knee height. One foot remained flat on the floor with the knee bent at 90°, while the opposite leg was extended forward with the knee straight, heel on the floor, and toes pointing upward. Participants placed one hand over the other, aligned the middle fingers, took a deep breath, and reached forward toward the toes while exhaling, keeping the back straight and head up. The distance between the tip of the middle finger and the toes was recorded: touching the toes scored 0, not reaching the toes received a negative value, and reaching past the toes received a positive value. Participants were reminded to bend only at the hip and maintain proper posture.

**Shoulder range of motion (ROM):** Due to remote assessment constraints, a validated smartphone goniometer application (Angulus) was used to measure joint ROM [8]. For participants in this study, measurements included shoulder flexion, abduction, and extension.

Participants stood upright with their feet shoulder-width apart and arms relaxed at their sides. **Shoulder flexion** was assessed first by raising the arm forward and upward as far as possible without pain, with the elbow straight and the palm facing inward. The assistant stood on the same side as the moving arm to record a lateral view. After a 30–60 s rest, **shoulder extension** was measured by moving the arm backward without bending the elbow or rotating the trunk, while the assistant remained at the participant’s side to capture a lateral view. Following another 30–60 s rest, **shoulder abduction** was performed by raising the arm laterally to ear level, keeping the elbow straight and the palm facing downward. The assistant recorded the movement from a frontal view. Participants were instructed to maintain an upright posture and avoid compensatory movements throughout all measurements. Assessments were conducted bilaterally. All photographs were sent to the researchers via email and analysed using the Angulus application to determine ROM.

**Supplementary figures**


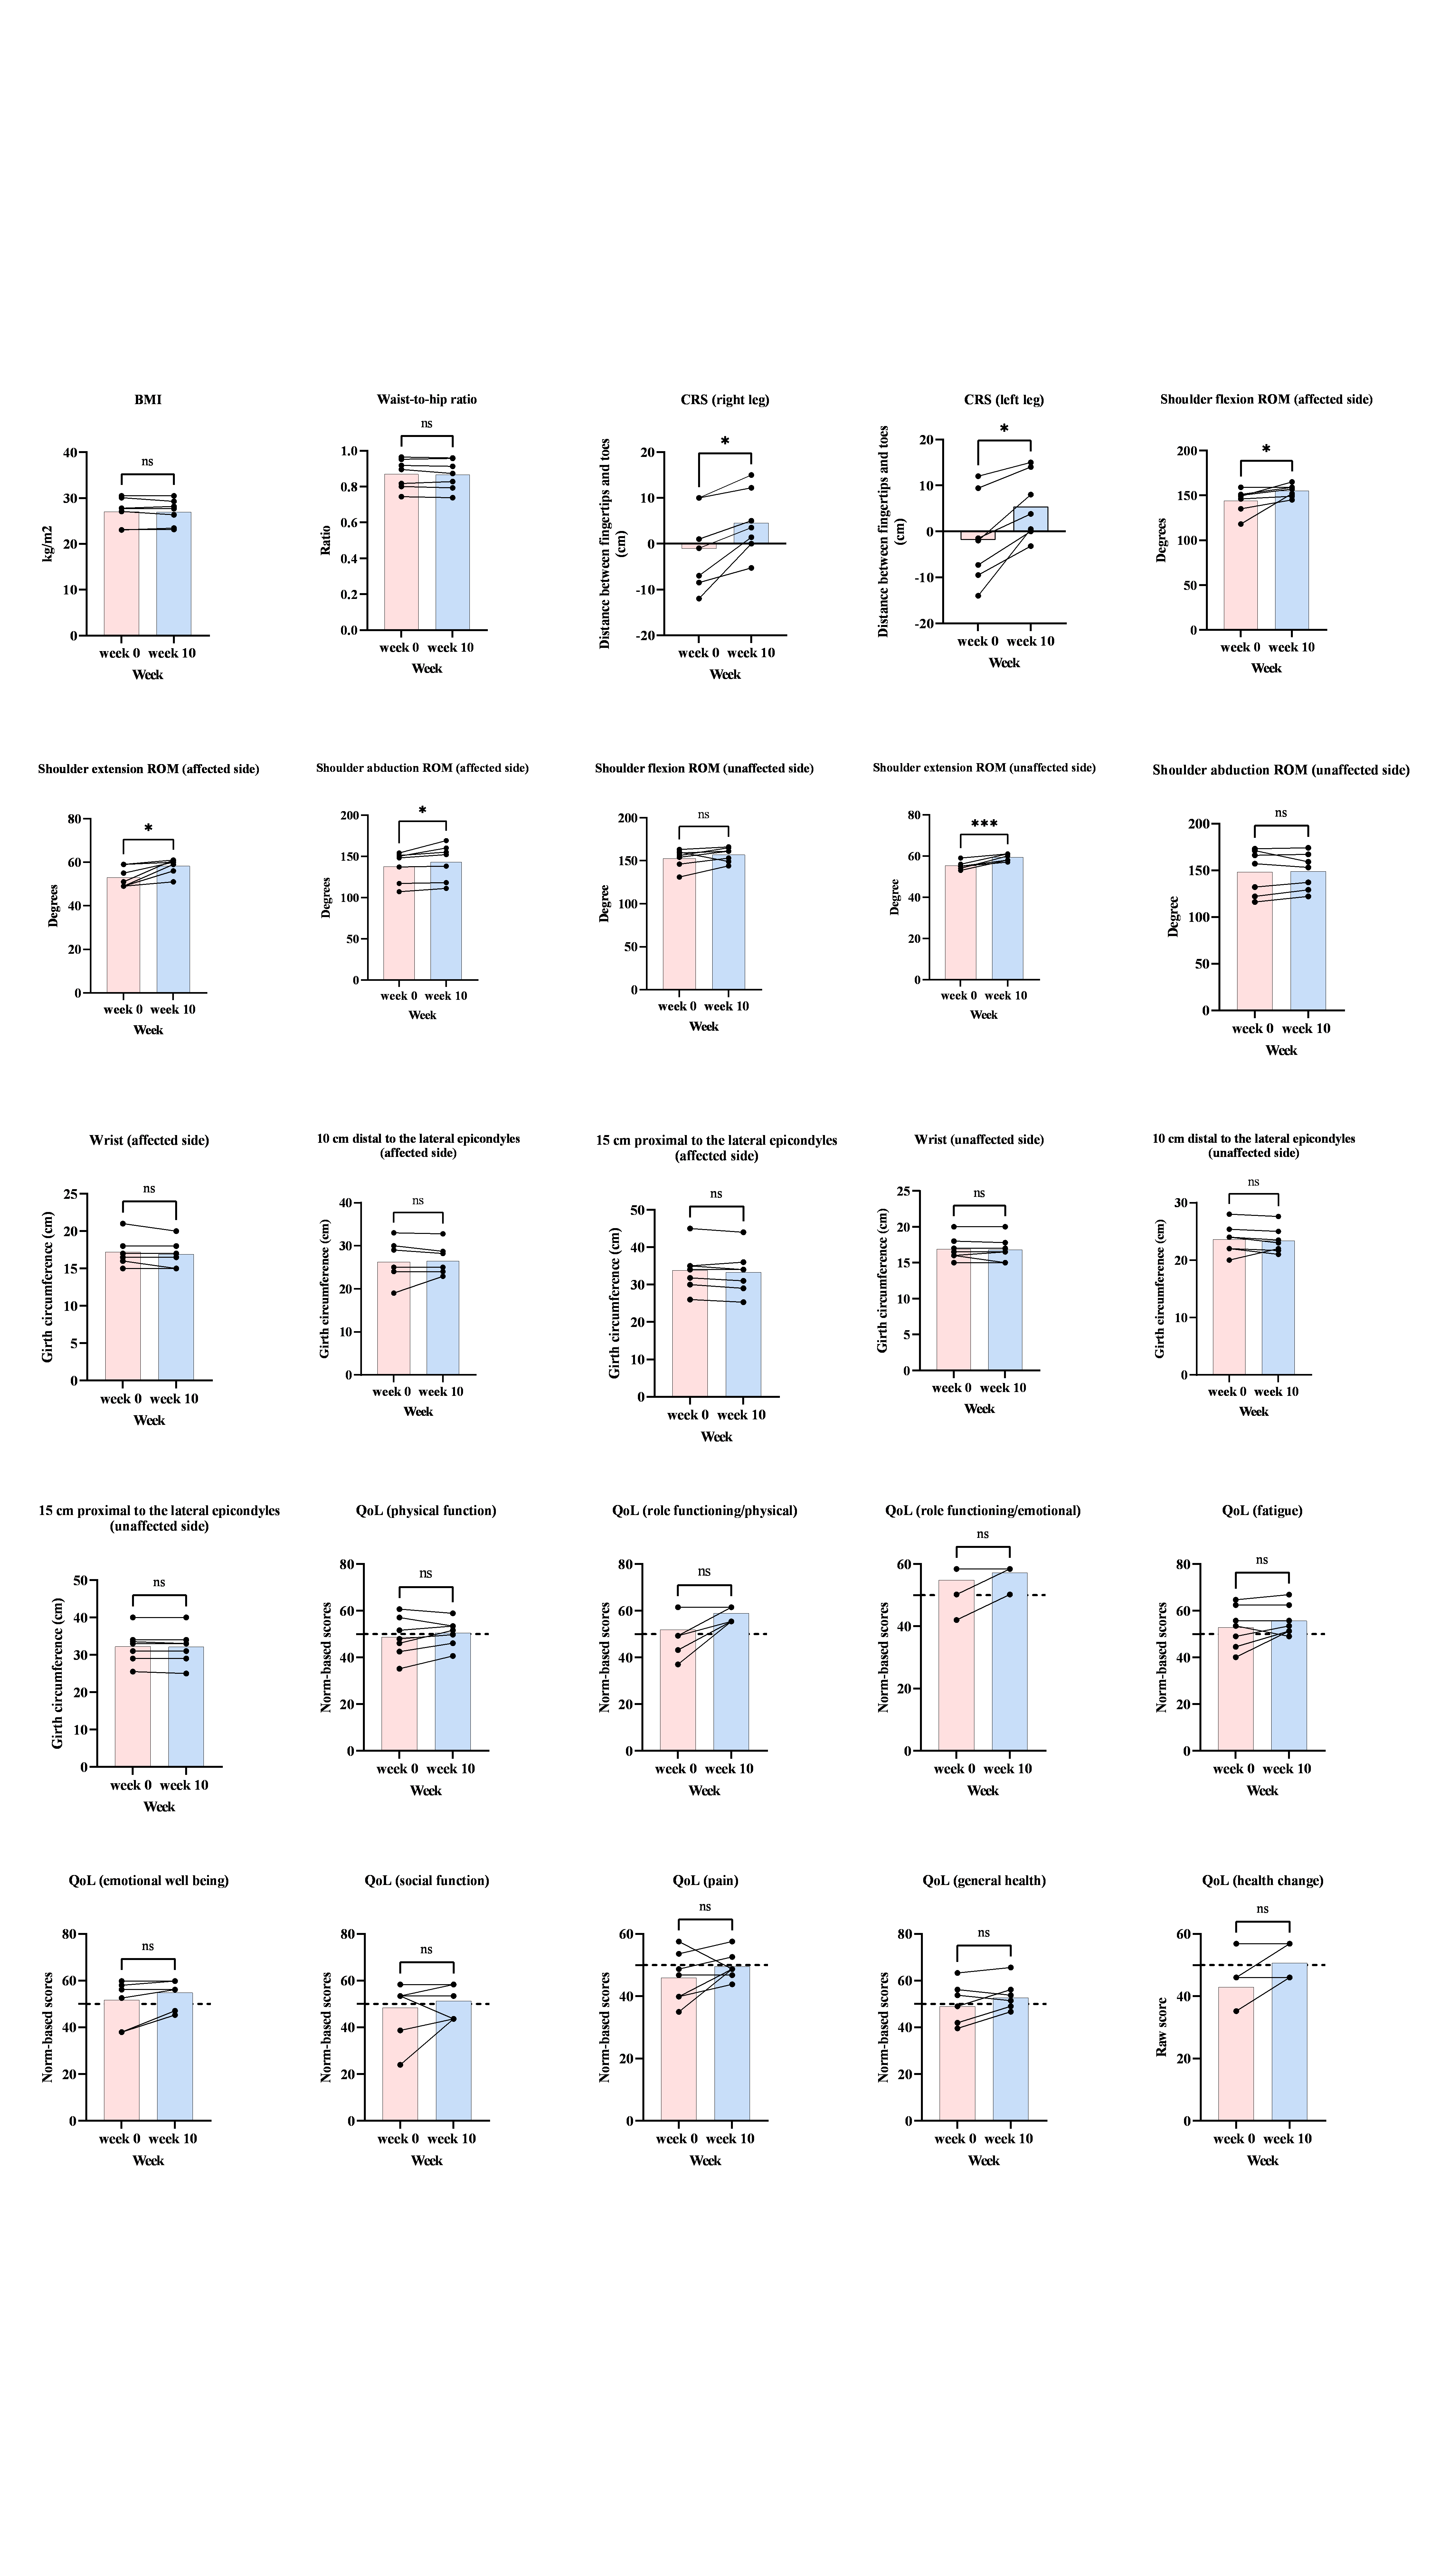


**Figure S1. Measurements in 7 participants with BCRL at baseline (week 0) and post-intervention (week 10) in the Pilates group.**

***Abbreviations****: BMI, Body Mass Index; CSR, chair sit and reach test; ROM, range of motion; QoL, quality of life.*


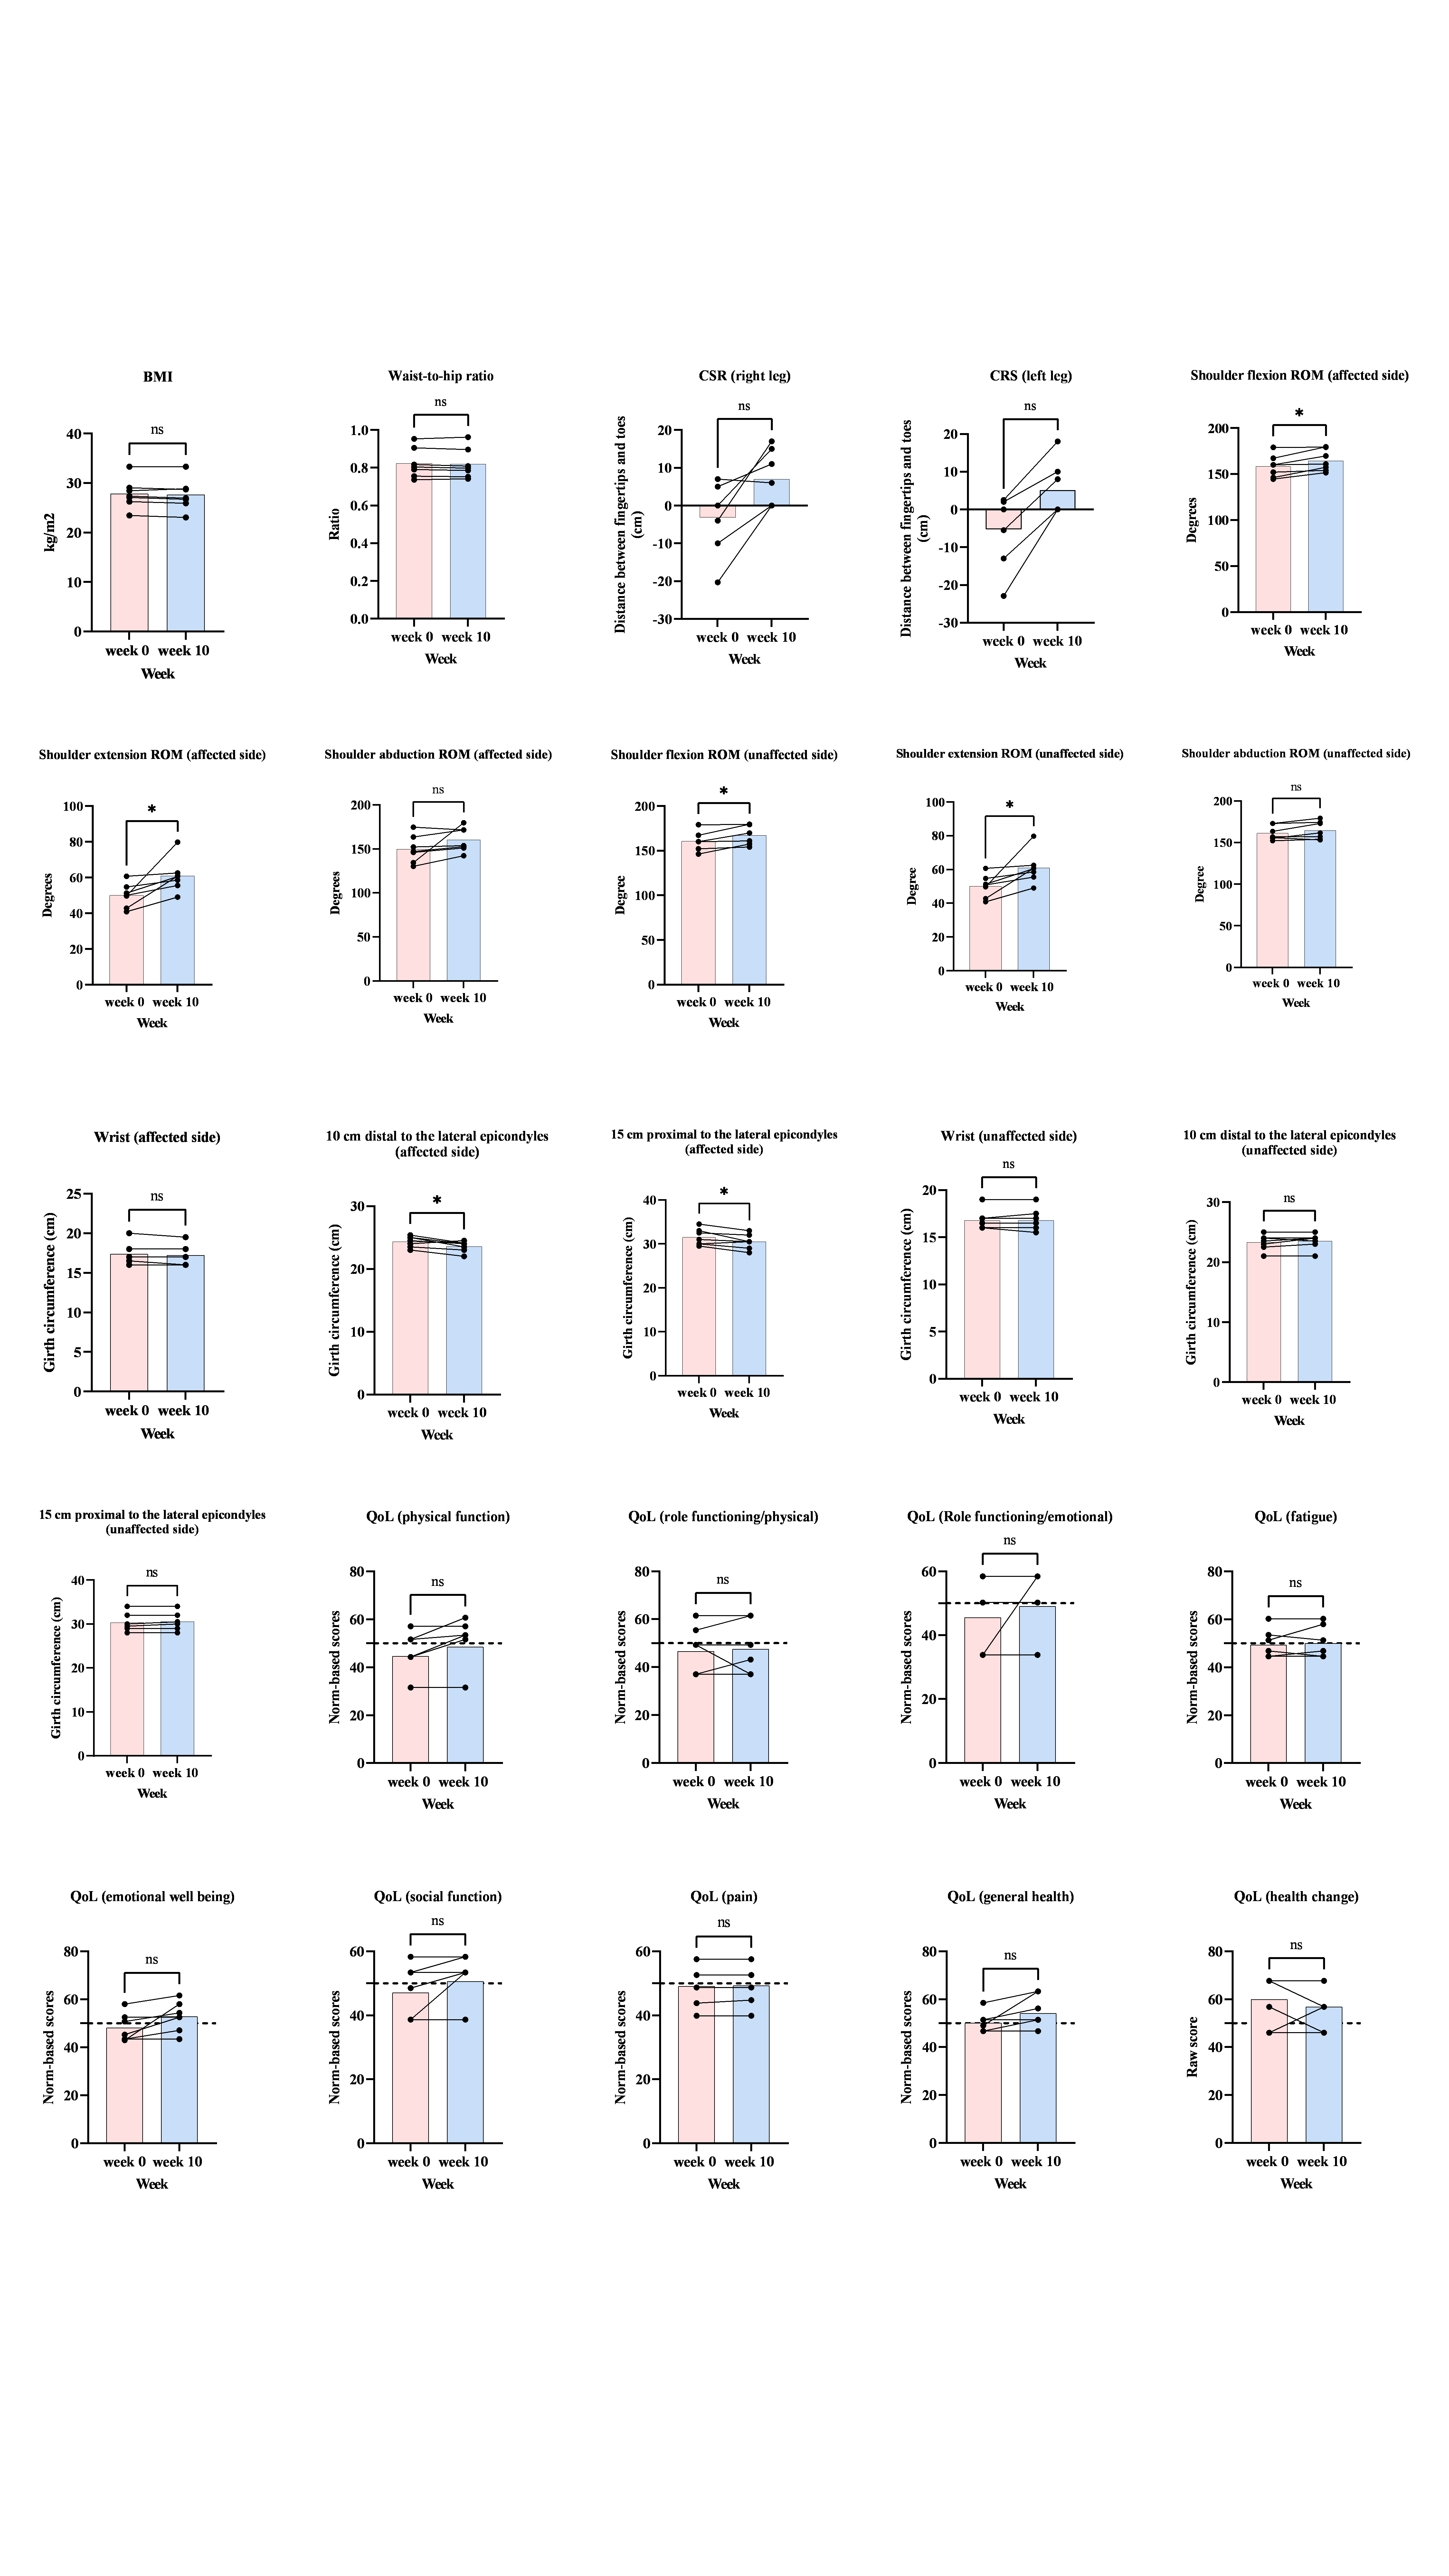


**Figure S2. Measurements in 7 participants with BCRL at baseline (week 0) and post-intervention (week 10) in the complex exercise group.**

***Abbreviations****: BMI, Body Mass Index; CSR, chair sit and reach test; ROM, range of motion; QoL, quality of life.*

**References**

1. Ware JE, Sherbourne CD. The MOS 36-item short-form health survey (SF-36). I. Conceptual framework and item selection. Med Care. 1992;30: 473–83.

2. Hays RD, Sherbourne CD, Mazel RM. The rand 36‐item health survey 1.0. Health Econ. 1993;2: 217–227. doi:10.1002/hec.4730020305

3. Zhang J-P, Pozuelo L, Brennan DM, Hoar B, Hoogwerf BJ. Association of SF-36 With Coronary Artery Disease Risk Factors and Mortality: A PreCIS Study. Prev Cardiol. 2009; no-no. doi:10.1111/j.1751-7141.2009.00061.x

4. Cormie P, Spry N, Jasas K, Johansson M, Yusoff IF, Newton RU, et al. Exercise as Medicine in the Management of Pancreatic Cancer. Med Sci Sports Exerc. 2014;46: 664–670. doi:10.1249/MSS.0000000000000160

5. Centers for Disease Control and Prevention. About Body Mass Index (BMI). 2025 [cited 17 Feb 2026]. Available: https://www.cdc.gov/bmi/about/index.html

6. World Health Organization. Waist circumference and waist-hip ratio: report of a WHO expert consultation. 2008. Available: https://www.who.int/publications/i/item/9789241501491

7. Jones CJ, Rikli RE, Max J, Noffal G. The Reliability and Validity of a Chair Sit-and-Reach Test as a Measure of Hamstring Flexibility in Older Adults. Res Q Exerc Sport. 1998;69: 338–343. doi:10.1080/02701367.1998.10607708

8. Porkodi J, Karthik V, Mathunny JJ, Ashokkumar D. Reliability and Validity of Angulus- Smartphone Application for Measuring Wrist Flexion and Extension. 2023 3rd International conference on Artificial Intelligence and Signal Processing (AISP). IEEE; 2023. pp. 1–4. doi:10.1109/AISP57993.2023.10135006
